# Supplementary material
Source: MDPI journal article supplement (https://www.mdpi.com/2673-3293/4/4/29)
Supplement: s1 [file s1]

---

Supplementary information

**Table S1:** Comparison between numerical (Num.) and analytical results for dimensionless concentration of substrate  $u(\zeta)$  for various values of parameter  $\varphi_1$  when  $\gamma_1 = \gamma_2 = 0.1$  and  $\alpha_1 = 5$ .

| $\zeta$ | $\varphi_1 = 10$ and $m = 0.7285$ |                                                    |                    |                                     |                                        | $\varphi_1 = 15$ and $m = 0.6101$ |                                                    |                    |                                     |                                     |
|---------|-----------------------------------|----------------------------------------------------|--------------------|-------------------------------------|----------------------------------------|-----------------------------------|----------------------------------------------------|--------------------|-------------------------------------|-------------------------------------|
|         | Num.                              | AGM<br>Eq.(20)<br>or HPM<br>[15] or<br>ADM<br>[30] | TSM<br>Eq.<br>(35) | Error<br>% of<br>AGM<br>Eq.<br>(20) | Error<br>%<br>of<br>TSM<br>Eq.<br>(35) | Num.                              | AGM<br>Eq.(20)<br>or HPM<br>[15] or<br>ADM<br>[30] | TSM<br>Eq.<br>(35) | Error<br>% of<br>AGM<br>Eq.<br>(20) | Error<br>%<br>of<br>TSM<br>Eq. (35) |
| 0       | 0.73                              | 0.72                                               | 0.73               | 1.37                                | 0.00                                   | 0.60                              | 0.58                                               | 0.61               | 3.33                                | 1.67                                |
| 0.2     | 0.74                              | 0.73                                               | 0.74               | 1.35                                | 0.00                                   | 0.62                              | 0.59                                               | 0.63               | 4.84                                | 1.61                                |
| 0.4     | 0.77                              | 0.76                                               | 0.77               | 1.30                                | 0.00                                   | 0.67                              | 0.65                                               | 0.67               | 2.98                                | 0.00                                |
| 0.6     | 0.83                              | 0.82                                               | 0.83               | 1.20                                | 0.00                                   | 0.75                              | 0.73                                               | 0.75               | 2.67                                | 0.00                                |
| 0.8     | 0.90                              | 0.90                                               | 0.90               | 0.00                                | 0.00                                   | 0.86                              | 0.85                                               | 0.86               | 1.16                                | 0.00                                |
| 1       | 1.00                              | 1.00                                               | 1.00               | 0.00                                | 0.00                                   | 1.00                              | 1.00                                               | 1.00               | 0.00                                | 0.00                                |
|         | Average error %                   |                                                    |                    | 0.87                                | 0.00                                   | Average error %                   |                                                    |                    | 2.50                                | 0.55                                |

---

**Table S2:** Comparison between numerical and analytical results for dimensionless concentration of substrate  $u(\zeta)$  for various values of parameter  $\gamma_1$  when  $\varphi_1 = \gamma_2 = 0.1$  and  $\alpha_1 = 5$ .

| $\zeta$ | $\gamma_1 = 7$ and $m = 0.8052$ |                                                               |                    |                                     |                                  | $\gamma_1 = 15$ and $m = 0.6101$ |                                                               |                    |                                     |                                  |
|---------|---------------------------------|---------------------------------------------------------------|--------------------|-------------------------------------|----------------------------------|----------------------------------|---------------------------------------------------------------|--------------------|-------------------------------------|----------------------------------|
|         | Num.                            | AGM<br>Eq.<br>(20)<br>or<br>HPM<br>[15]]<br>or<br>ADM<br>[30] | TSM<br>Eq.<br>(35) | Error<br>% of<br>AGM<br>Eq.<br>(20) | Error<br>% of<br>TSM<br>Eq. (35) | Num.                             | AGM<br>Eq.<br>(20)<br>or<br>HPM<br>[15]]<br>or<br>ADM<br>[30] | TSM<br>Eq.<br>(35) | Error<br>% of<br>AGM<br>Eq.<br>(20) | Error<br>% of<br>TSM<br>Eq. (35) |
| 0       | 0.80                            | 0.80                                                          | 0.80               | 0.00                                | 0.00                             | 0.60                             | 0.58                                                          | 0.61               | 3.33                                | 1.67                             |
| 0.2     | 0.81                            | 0.81                                                          | 0.81               | 0.00                                | 0.00                             | 0.62                             | 0.59                                                          | 0.63               | 4.84                                | 1.61                             |
| 0.4     | 0.84                            | 0.83                                                          | 0.84               | 1.20                                | 0.00                             | 0.67                             | 0.65                                                          | 0.67               | 2.98                                | 0.00                             |
| 0.6     | 0.88                            | 0.87                                                          | 0.88               | 1.14                                | 0.00                             | 0.75                             | 0.73                                                          | 0.75               | 2.67                                | 0.00                             |
| 0.8     | 0.93                            | 0.93                                                          | 0.93               | 0.00                                | 0.00                             | 0.86                             | 0.85                                                          | 0.86               | 1.16                                | 0.00                             |
| 1       | 1.00                            | 1.00                                                          | 1.00               | 0.00                                | 0.00                             | 1.00                             | 1.00                                                          | 1.00               | 0.00                                | 0.00                             |
|         | Average error %                 |                                                               |                    | 0.39                                | 0.00                             | Average error %                  |                                                               |                    | 2.50                                | 0.55                             |

**Table S3:** Comparison between numerical and analytical results for dimensionless concentration of substrate  $u(\zeta)$  for various values of parameter  $\gamma_2$  when  $\gamma_1 = \varphi_1 = 0.1$  and  $\alpha_1 = 5$ .

| $\zeta$ | $\gamma_2 = 5$ and $m = 0.8399$ |                                   |                    |                                     |                                  | $\gamma_2 = 7$ and $m = 0.7623$ |                                      |                    |                                     |                                     |
|---------|---------------------------------|-----------------------------------|--------------------|-------------------------------------|----------------------------------|---------------------------------|--------------------------------------|--------------------|-------------------------------------|-------------------------------------|
|         | Num.                            | AGM<br>Eq. (20)<br>or HPM<br>[15] | TSM<br>Eq.<br>(35) | Error<br>% of<br>AGM<br>Eq.<br>(20) | Error<br>% of<br>TSM<br>Eq. (35) | Num.                            | AGM<br>Eq.<br>(20)<br>or HPM<br>[15] | TSM<br>Eq.<br>(35) | Error<br>% of<br>AGM<br>Eq.<br>(20) | Error<br>%<br>of<br>TSM<br>Eq. (35) |
| 0       | 0.84                            | 0.86                              | 0.84               | 2.38                                | 0.00                             | 0.77                            | 0.80                                 | 0.76               | 3.90                                | 1.30                                |
| 0.2     | 0.85                            | 0.86                              | 0.85               | 1.18                                | 0.00                             | 0.78                            | 0.81                                 | 0.77               | 3.85                                | 1.28                                |
| 0.4     | 0.87                            | 0.88                              | 0.87               | 1.15                                | 0.00                             | 0.81                            | 0.83                                 | 0.80               | 2.47                                | 1.23                                |
| 0.6     | 0.90                            | 0.91                              | 0.90               | 1.11                                | 0.00                             | 0.86                            | 0.87                                 | 0.85               | 1.16                                | 1.16                                |
| 0.8     | 0.95                            | 0.95                              | 0.94               | 0.00                                | 1.05                             | 0.92                            | 0.93                                 | 0.92               | 1.09                                | 0.00                                |
| 1       | 1.00                            | 1.00                              | 1.00               | 0.00                                | 0.00                             | 1.00                            | 1.00                                 | 1.00               | 0.00                                | 0.00                                |
|         | Average error %                 |                                   |                    | 0.97                                | 0.17                             | Average error %                 |                                      |                    | 2.09                                | 0.83                                |

**Table S4:** Comparison between numerical and analytical results for dimensionless concentration of product  $v(\zeta)$  for various values of parameter  $\varphi_2$  when  $\gamma_1 = 1, \gamma_2 = 1, \gamma_3 = 0.1, \gamma_4 = 1, \alpha_1 = 5$  and  $m = 0.9158$ .

| $\zeta$ | $\varphi_2 = 20$ and $l = 0.4445$ |                                                         |                    |                                     |                                  | $\varphi_2 = 35$ and $l = 0.0321$ |                                                         |                    |                                     |                                     |
|---------|-----------------------------------|---------------------------------------------------------|--------------------|-------------------------------------|----------------------------------|-----------------------------------|---------------------------------------------------------|--------------------|-------------------------------------|-------------------------------------|
|         | Num.                              | AGM<br>Eq.<br>(26)<br>or HPM<br>[15]] or<br>ADM<br>[30] | TSM<br>Eq.<br>(41) | Error<br>% of<br>AGM<br>Eq.<br>(26) | Error<br>% of<br>TSM<br>Eq. (41) | Num.                              | AGM<br>Eq.<br>(26)<br>or HPM<br>[15]] or<br>ADM<br>[30] | TSM<br>Eq.<br>(41) | Error<br>% of<br>AGM<br>Eq.<br>(26) | Error<br>% of<br>TSM<br>Eq.<br>(41) |
| 0       | 0.44                              | 0.44                                                    | 0.44               | 0.00                                | 0.00                             | 0.03                              | 0.02                                                    | 0.03               | 33.33                               | 0.00                                |
| 0.2     | 0.47                              | 0.46                                                    | 0.47               | 2.13                                | 0.00                             | 0.07                              | 0.06                                                    | 0.07               | 14.29                               | 0.00                                |
| 0.4     | 0.53                              | 0.53                                                    | 0.53               | 0.00                                | 0.00                             | 0.19                              | 0.18                                                    | 0.19               | 5.26                                | 0.00                                |
| 0.6     | 0.65                              | 0.64                                                    | 0.65               | 1.54                                | 0.00                             | 0.39                              | 0.38                                                    | 0.39               | 2.56                                | 0.00                                |
| 0.8     | 0.81                              | 0.80                                                    | 0.81               | 1.23                                | 0.00                             | 0.66                              | 0.66                                                    | 0.66               | 0.00                                | 0.00                                |
| 1       | 1.00                              | 1.00                                                    | 1.00               | 0.00                                | 0.00                             | 1.00                              | 1.00                                                    | 1.00               | 0.00                                | 0.00                                |
|         | Average error %                   |                                                         |                    | 0.82                                | 0.00                             | Average error %                   |                                                         |                    | 9.24                                | 0.00                                |

**Table S5:** Comparison between numerical and analytical results for dimensionless concentration of product  $v(\zeta)$  for various values of parameter  $\gamma_3$  when  $\gamma_1 = 1, \gamma_2 = 1, \varphi_1 = 0.1, \gamma_4 = 1, \alpha_1 = 10$  and  $m = 0.9542$ .

| $\zeta$ | $\gamma_3 = 40$ and $l = 0.39268$ |                                                      |                    |                                     |                                     | $\gamma_3 = 65$ and $l = 0.01502$ |                                                            |                    |                                     |                                     |
|---------|-----------------------------------|------------------------------------------------------|--------------------|-------------------------------------|-------------------------------------|-----------------------------------|------------------------------------------------------------|--------------------|-------------------------------------|-------------------------------------|
|         | Num.<br>Eq. (10)                  | AGM<br>Eq. (26)<br>or HPM<br>[15]] or<br>ADM<br>[30] | TSM<br>Eq.<br>(41) | Error<br>% of<br>AGM<br>Eq.<br>(26) | Error<br>% of<br>TSM<br>Eq.<br>(41) | Num<br>Eq.<br>(10)                | AGM<br>Eq.<br>(26)<br>or HPM<br>[15]]<br>or<br>ADM<br>[30] | TSM<br>Eq.<br>(41) | Error<br>% of<br>AGM<br>Eq.<br>(26) | Error<br>% of<br>TSM<br>Eq.<br>(41) |
| 0       | 0.39                              | 0.39                                                 | 0.39               | 0.00                                | 0.00                                | 0.01                              | 0.01                                                       | 0.01               | 0.00                                | 0.00                                |
| 0.2     | 0.42                              | 0.42                                                 | 0.42               | 0.00                                | 0.00                                | 0.05                              | 0.05                                                       | 0.05               | 0.00                                | 0.00                                |
| 0.4     | 0.49                              | 0.49                                                 | 0.49               | 0.00                                | 0.00                                | 0.18                              | 0.17                                                       | 0.18               | 5.55                                | 0.00                                |
| 0.6     | 0.62                              | 0.61                                                 | 0.62               | 1.61                                | 0.00                                | 0.38                              | 0.37                                                       | 0.38               | 2.63                                | 0.00                                |
| 0.8     | 0.79                              | 0.79                                                 | 0.79               | 0.00                                | 0.00                                | 0.66                              | 0.66                                                       | 0.66               | 0.00                                | 0.00                                |
| 1       | 1.00                              | 1.00                                                 | 1.00               | 0.00                                | 0.00                                | 1.00                              | 1.00                                                       | 1.00               | 0.00                                | 0.00                                |
|         | Average error %                   |                                                      |                    | 0.27                                | 0.00                                | Average error %                   |                                                            |                    | 1.36                                | 0.00                                |

**Table S6:** Comparison between numerical and analytical results for dimensionless concentration of product  $v(\zeta)$  for various values of parameter  $\gamma_4$  when  $\gamma_1 = 1, \gamma_2 = 1, \gamma_3 = 0.1, \varphi_1 = 1, \alpha_1 = 5$  and  $m = 0.915769$ .

| $\zeta$ | $\gamma_4 = 10$ and $l = 0.7029$ |                                                      |                    |                                     |                                     | $\gamma_4 = 20$ and $l = 0.4104$ |                                                        |                            |                                     |                                     |
|---------|----------------------------------|------------------------------------------------------|--------------------|-------------------------------------|-------------------------------------|----------------------------------|--------------------------------------------------------|----------------------------|-------------------------------------|-------------------------------------|
|         | Num.<br>Eq.<br>(10)              | AGM<br>Eq. (26)<br>or HPM<br>[15]] or<br>ADM<br>[30] | TSM<br>Eq.<br>(41) | Error<br>% of<br>AGM<br>Eq.<br>(26) | Error<br>% of<br>TSM<br>Eq.<br>(41) | Num<br>Eq.<br>(10)               | AGM<br>Eq.<br>(26)<br>or HPM<br>[15] or<br>ADM<br>[30] | TS<br>M<br>Eq.<br>(41<br>) | Error<br>% of<br>AGM<br>Eq.<br>(26) | Error<br>% of<br>TSM<br>Eq.<br>(41) |
| 0       | 0.70                             | 0.72                                                 | 0.70               | 2.86                                | 0.00                                | 0.41                             | 0.44                                                   | 0.41                       | 7.32                                | 0.00                                |
| 0.2     | 0.71                             | 0.73                                                 | 0.71               | 2.82                                | 0.00                                | 0.43                             | 0.46                                                   | 0.43                       | 6.98                                | 0.00                                |
| 0.4     | 0.75                             | 0.76                                                 | 0.75               | 1.33                                | 0.00                                | 0.51                             | 0.53                                                   | 0.51                       | 3.92                                | 0.00                                |
| 0.6     | 0.81                             | 0.82                                                 | 0.81               | 1.23                                | 0.00                                | 0.63                             | 0.64                                                   | 0.63                       | 1.59                                | 0.00                                |
| 0.8     | 0.90                             | 0.90                                                 | 0.90               | 0.00                                | 0.00                                | 0.80                             | 0.80                                                   | 0.80                       | 0.00                                | 0.00                                |
| 1       | 1.00                             | 1.00                                                 | 1.00               | 0.00                                | 0.00                                | 1.00                             | 1.00                                                   | 1.00                       | 0.00                                | 0.00                                |
|         | Average error %                  |                                                      |                    | 1.37                                | 0.00                                | Average error %                  |                                                        |                            | 3.30                                | 0.00                                |

**Table S7:** Comparison between numerical and analytical normalized steady-state source terms of liquid phase  $\psi_l$  for various values of parameter  $\varphi_1$  and  $\alpha_1$  when  $\gamma_1 = \gamma_2 = 0.1$ .

| $\varphi_1$ | $\alpha_1 = 0.1$    |                                                               |                    |                                     |                                  | $\alpha_1 = 0.5$    |                                                   |                    |                                     |                                     |
|-------------|---------------------|---------------------------------------------------------------|--------------------|-------------------------------------|----------------------------------|---------------------|---------------------------------------------------|--------------------|-------------------------------------|-------------------------------------|
|             | Num.<br>Eq.<br>(13) | AGM<br>Eq.<br>(27)<br>or<br>HPM<br>[15]]<br>or<br>ADM<br>[30] | TSM<br>Eq.<br>(43) | Error<br>% of<br>AGM<br>Eq.<br>(27) | Error<br>% of<br>TSM<br>Eq. (43) | Num.<br>Eq.<br>(13) | AGM<br>Eq. (27)<br>or HPM<br>[15]] or<br>ADM [30] | TSM<br>Eq.<br>(43) | Error<br>% of<br>AGM<br>Eq.<br>(27) | Error<br>%<br>of<br>TSM<br>Eq. (43) |
| 0           | 0.06                | 0.06                                                          | 0.06               | 0.00                                | 0.00                             | 0.04                | 0.04                                              | 0.04               | 0.00                                | 0.00                                |
| 0.1         | 0.09                | 0.09                                                          | 0.09               | 0.00                                | 0.00                             | 0.07                | 0.07                                              | 0.07               | 0.00                                | 0.00                                |
| 0.5         | 0.20                | 0.21                                                          | 0.21               | 5.00                                | 5.00                             | 0.15                | 0.15                                              | 0.15               | 0.00                                | 0.00                                |
| 1           | 0.34                | 0.37                                                          | 0.34               | 8.82                                | 0.00                             | 0.26                | 0.27                                              | 0.26               | 3.85                                | 0.00                                |
| 5           | 1.25                | 1.56                                                          | 1.33               | 24.8                                | 6.40                             | 1.00                | 1.15                                              | 1.01               | 15.00                               | 1.00                                |
| 10          | 2.08                | 3.09                                                          | 2.42               | 48.56                               | 16.35                            | 1.74                | 2.27                                              | 1.90               | 30.46                               | 9.19                                |
| 50          | 5.64                | 15.2                                                          | 5.23               | 169.7                               | 7.27                             | 4.81                | 11.15                                             | 5.22               | 131.8                               | 8.52                                |
| 100         | 7.75                | 30.4                                                          | 5.66               | 291.7                               | 26.97                            | 7.31                | 22.27                                             | 5.66               | 204.6                               | 22.57                               |
|             | Average error %     |                                                               |                    | 68.68                               | 7.75                             | Average error %     |                                                   |                    | 48.22                               | 5.16                                |

**Table S8:** Comparison between numerical and analytical normalized steady-state source terms of gas phase  $\psi_g$  for various values of parameter  $\varphi_2$  and  $\alpha_1$  when  $\gamma_1 = \gamma_2 = 1, \gamma_3 = \gamma_4 = 0.1, \varphi_1 = 1$  and  $\omega = 1$ .

| $\varphi_2$ | $\alpha_1 = 0.1$    |                                                         |                 |                               |                               | $\alpha_1 = 0.5$    |                                                   |                 |                              |                                    |
|-------------|---------------------|---------------------------------------------------------|-----------------|-------------------------------|-------------------------------|---------------------|---------------------------------------------------|-----------------|------------------------------|------------------------------------|
|             | Num.<br>Eq.<br>(14) | AGM<br>Eq.<br>(28)<br>HPM<br>[15],<br>or<br>ADM<br>[30] | TSM<br>Eq. (44) | % Error<br>of AGM<br>Eq. (28) | % Error<br>of TSM<br>Eq. (44) | Num.<br>Eq.<br>(14) | AGM Eq.<br>(28)<br>or HPM<br>[15]] or<br>ADM [30] | TSM<br>Eq. (44) | % Error<br>of AGM<br>Eq.(28) | % Error<br>% of<br>TSM<br>Eq. (44) |
| 0           | 0.08                | 0.09                                                    | 0.09            | 12.50                         | 12.50                         | 0.06                | 0.07                                              | 0.06            | 16.67                        | 0.00                               |
| 0.1         | 0.12                | 0.14                                                    | 0.12            | 16.67                         | 0.00                          | 0.10                | 0.10                                              | 0.10            | 0.00                         | 0.00                               |
| 0.5         | 0.27                | 0.32                                                    | 0.28            | 18.52                         | 3.70                          | 0.22                | 0.23                                              | 0.22            | 4.54                         | 0.00                               |
| 1           | 0.47                | 0.54                                                    | 0.47            | 14.87                         | 0.00                          | 0.37                | 0.40                                              | 0.37            | 8.11                         | 0.00                               |
| 5           | 2.02                | 2.36                                                    | 2.03            | 16.83                         | 0.49                          | 1.58                | 1.73                                              | 1.60            | 9.49                         | 1.27                               |
| 10          | 3.96                | 4.64                                                    | 3.98            | 17.17                         | 0.50                          | 3.10                | 3.40                                              | 3.14            | 9.68                         | 1.29                               |
| 50          | 19.5                | 22.8                                                    | 19.55           | 17.21                         | 0.41                          | 15.26               | 16.73                                             | 15.42           | 9.63                         | 1.05                               |
| 100         | 38.9                | 45.5                                                    | 39.02           | 17.19                         | 0.41                          | 30.46               | 33.40                                             | 30.78           | 9.65                         | 1.05                               |
|             | Average error %     |                                                         |                 | 16.37                         | 2.25                          | Average error %     |                                                   |                 | 8.47                         | 0.58                               |
